# Supplementary material for: Programmed genome editing of the omega-1 ribonuclease of the blood fluke, Schistosoma mansoni
Source: eLife. 2019 Jan 15;8:e41337. doi: 10.7554/eLife.41337 (PMC6355194; doi:10.7554/eLife.41337)
Supplement: Supplementary file 1. [file elife-41337-supp1.xlsx]

## Sheet: Sheet1
Supplement File 1A. Putative NHEJ pathway genes in S. mansoni.
The list of human genes taken from Table 1 (Lee et al., 2014). The Pfam domain content of S. mansoni genes was taken from the 50 HG data set (International Helmith Genomes Consortium 2018)
Human gene	Ensembl/UniProt identifier of human gene	Protein domains in human gene, based on UniProt entry	S. mansoni genes with these domains	Best S. mansoni candidate
Ku70	ENSG00000196419 / XRCC6_HUMAN	Ku (PF02735)	Ku: Smp_211060, Smp_083780	Smp_211060, Smp_083780
		Ku_C (PF03730)	Ku_C: Smp_211060
		Ku_N (PF03731)	Ku_N: Smp_211060, Smp_083780
		SAP (PF02037)	SAP: 6 other genes
Ku80	ENSG00000079246 / XRCC5_HUMAN	Ku (PF02735)	Ku: Smp_211060, Smp_083780	Smp_211060, Smp_083780
		Ku_C (PF03730)	Ku_C: Smp_211060
		Ku_N (PF03731)	Ku_N: Smp_211060, Smp_083780
		Ku_PK_bind (PF08785)	Ku_PK_bind: NA
DNA ligase IV	ENSG00000174405 / DNLI4_HUMAN	BRCT (PF00533)	BRCT: Smp_148660, 7 other genes	Smp_148660 or Smp_178000
		DNA_ligase_A_C (PF04679)	DNA_ligase_A_C: Smp_148660, Smp_019840
		DNA_ligase_A_M (PF01068)	DNA_ligase_A_M: Smp_148660, Smp_019840
		DNA_ligase_A_N (PF04675)	DNA_ligase_A_N: Smp_148660, Smp_019840
		DNA_ligase_IV (PF11411)	DNA_ligase_IV: Smp_178000
DNA-PKcs	ENSG00000253729 / PRKDC_HUMAN	FAT (PF02259)	FAT: Smp_162340, Smp_122910, Smp_024190	Smp_162340
		FATC (PF02260)	FATC: Smp_157820, Smp_142710, Smp_162340, Smp_122910
		NUC194 (PF08163)	NUC194: NA
		PI3_P14_kinase (PF00454)	P13_P14_kinase: Smp_162340, Smp_122910, Smp_157820, Smp_142710, Smp_122910, 5 other genes
Artemis	ENSG00000152457 / DCR1C_HUMAN	DRMBL (PF07522)	DRMBL: Smp_136360	Smp_136360
		Lactamase_B_2 (PF12706)	Lactamase_B_2: Smp_068090, Smp_031040, Smp_136360
XRCC4	ENSG00000152422 / XRCC4_HUMAN	XRCC4 (PF06632)	XRCC4: Smp_135860	Smp_135860
Cernunnos/XLF	ENSG00000187736 / NHEJ1_HUMAN	XLF (PF09302)	XLF: NA	NA
Supplement File 1B. Putative HDR pathway genes in S. mansoni.
The list of human genes is based upon (Pardo et al., 2009). The Pfam domain content of S. mansoni genes was taken from the 50 HG data set (International Helmith Genomes Consortium 2018)
Human gene	Ensembl/UniProt identifier of human gene	Protein domains in human gene, based on UniProt entry	S. mansoni genes with these domains	Best S. mansoni candidate
Rad51	ENSG00000051180 / RAD51_HUMAN, ENSG00000182185 / RA51B_HUMAN, ENSG00000108384 / RA51C_HUMAN, ENSG00000185379 / RA51D_HUMAN	Rad51 (PF08423)	Rad51: Smp_124230 (e-143), Smp_134090 (e-14), Smp_160630 (e-6)	Smp_124230
RPA	ENSG00000132383 / RFA1_HUMAN, ENSG00000117748 / RFA2_HUMAN, ENSG00000106399 / RFA3_HUMAN	RFA1_HUMAN: Rep-A_N (PF04057), Rep_fac-A_C (PF08646), REPA_OB_2 (PF16900), tRNA_anti-codon (PF01336)	Rep-A_N: Smp_121800, Rep_fac-A_C: Smp_121800, REPA_OB_2: none, tRNA_anti-codon: Smp_121800 and 8 others	Smp_121800, Smp_080530, Smp_213370
		RFA2_HUMAN: RPA_C (PF08784)	RPA_C: Smp_080530
		RFA3_HUMAN: Rep_fac-A_3 (PF08661)	Rep_fac-A_3: Smp_213370
