# Supplementary material for: Programmed genome editing of the omega-1 ribonuclease of the blood fluke, Schistosoma mansoni
Source: eLife. 2019 Jan 15;8:e41337. doi: 10.7554/eLife.41337 (PMC6355194; doi:10.7554/eLife.41337)
Supplement: Supplementary file 2. — Nucleotide sequences and position on the schistosome ω1 gene; Smp_193860. [file elife-41337-supp2.xlsx]

## Sheet: Sheet1
Supplement File 2. Primer sequences
Gene/Experiment	Name	5' to 3' sequence	Position on Smp_193860
PCR control	Smω1-control-F	GTTAGTGTATCAAATGTTTTCAACC	3751-3775
	Smω1-control-R	GTTCTACATCCTTGTTATGTTCAGT	4717-4741
6-stop codons KI test	Smω1X6-6-stop codons casette-F	TAAGTGACTAGGTAACTGAGTAGC	none
	Smω1-R1	TCCAATCGGCACTGAGACG	3966-3984
	Smω1-R2	CCCACTGACAGGGTACAACA	4066-4085
	Smω1-R3	TAAGCCTCGATTCAGTGGGG	4102-4121
Amplicon miSeq library construction	miSeq-F	GTTATCGTGTATTGTTCAATAACG	3723-3746
	miSeq-R	ATTACAACATGAATCACATACTTC	3901-3924
Smω1 transcript study	Smω1-rt-F	GGTTACTTTAAATTTGGTATC	3854-3874
	Smω1-rt-R	AGTTTCCAAGGAACGGGCAG	5992-6011
Smω1 gene copy number	OMGgRNA1F	ACAGTTTTAGGTCGTTATCGTGT	3710-3732
	OMGgRNA1R	TCAGTAGATTGAGCTTCTGCATCA	3879-3902
CRISPR/Cas 9 efficiency primers
	Smω1-OVR-F	GGTTTGTGTGCAGTTGAGGATCC	3812-3834
	Smω1-OUT-F	GTTAGTGTATCAAATGTTTTCAACC	3751-3775
	Smω1-reverse	GCCTCGATTCAGTGGGGAAA	4099-4118
Gene/Experiment	Name	5' to 3' sequence	Position on Smp_056970
Smω1 transcript study and gene copy number	SmGAPDH-F	TGTGAAAGAGATCCAGCAAAC	292-312
	SmGAPDH-R	GATATTACCTGAGCTTTATCAATGG	371-395
