# Supplementary material for: Programmed genome editing of the omega-1 ribonuclease of the blood fluke, Schistosoma mansoni
Source: eLife. 2019 Jan 15;8:e41337. doi: 10.7554/eLife.41337 (PMC6355194; doi:10.7554/eLife.41337)
Supplement: Supplementary file 3. [file elife-41337-supp3.xlsx]

## Sheet: Sheet1
Supplement File 3. Frequency of knock-in sequences, indels and substitutions in NGS sequencing data.
The CRISPResso analysis used a window size (-w option) that included the whole 202 bp amplicon, except 25 bp at each end in order to exclude the primer regions.
Sample no.	Sample	Read-pairs sequenced	Read-pairs aligned (%amplicon reads)	Unmodified amplicon reads (% of aligned)	NHEJ amplicon reads (% of aligned)	NHEJ amplicon reads with insertions (% of aligned)	NHEJ amplicon reads with deletions (% of aligned)	NHEJ amplicon reads with substitutions (% of aligned)	HDR amplicon reads reported	Mixed HDR-NHEJ amplicon reads	Confirmed knock-in amplicon reads (% of aligned)*
1	eggs + Cas9 only	5567790	5,450,704 (98%)	4,155,337 (76%)	1,294,899 (24%)	8,751 (0.16%)	19,367 (0.36%)	1,287,881 (23.6%)	0	468	2 (0.00004%)
2	eggs	6145850	6,035,043 (98%)	4,579,470 (76%)	1,455,004 (24%)	8,591 (0.14%)	19,624 (0.33%)	1,448,091 (24.0%)	1	568	8 (0.0001%)
3	eggs + pLV_ω1X1 + ssODN	6572305	6,455,239 (98%)	4,949,175 (77%)	1,505,100 (23%)	10,427 (0.16%)	22,388 (0.35%)	1,497,386 (23.2%)	231	733	336 (0.005%)
4	eggs + ω1 gRNA	6005410	5,889,429 (98%)	4,560,750 (77%)	1,328,037 (23%)	10,615 (0.18%)	19,810 (0.34%)	1,321,434 (22.4%)	0	642	0
5	eggs + ssODN	6203238	6,081,763 (98%)	4,529,664 (74%)	1,569,448 (26%)	8,541 (0.14%)	20,692 (0.34%)	1,543,983 (25.4%)	0	651	3 (0.00005%)
6	eggs + heat-inactivated pLV_ω1X1 + ssODN	6179774	6,083,155 (98%)	4,662,311 (77%)	1,420,375 (23%)	8,686 (0.14%)	19,725 (0.32%)	1,413,041 (23.2%)	0	469	4 (0.00007%)
7	eggs + pLV_ω1X1 + ssODN	5285634	5,168,974 (98%)	3,744,812 (72%)	1,414,345 (27%)	5,716 (0.11%)	25,949 (0.50%)	1,401,835 (27.1%)	1	9816	9,368 (0.18%)
8	eggs + heat-inactivated pLV_ω1X1	5269242	5,192,472 (99%)	3,942,608 (76%)	1,249,483 (24%)	6,883 (0.13%)	16,282 (0.31%)	1,243,438 (23.9%)	2	379	4 (0.00008%)
9	eggs + pLV_ω1X1 + ssODN	2965075	2,894,187 (98%)	2,066,129 (71%)	822,372 (28%)	3,656 (0.13%)	16,678 (0.58%)	814,770 (28.2%)	0	5686	5419 (0.19%)
10	eggs + pLV_ω1X1	5963235	5,887,422 (99%)	4,415,104 (75%)	1,471,950 (25%)	6,160 (0.10%)	18,554 (0.32%)	1,464,598 (24.9%)	0	368	2 (0.00005%)
*number of insertions of the 24-bp knock-in sequence confirmed by ggsearch, by checking for insertions that have >=75% sequence identity to the expected 24-bp knock-in sequence.
